# Supplementary material for: Induced orbital asymmetry of nonpolar molecular additives for boosted rapid operating performance in lithium metal batteries
Source: Royal Society of Chemistry journal article supplement (doi:10.1039/d5eb00021a), 2025-01-01
Supplement: d5eb00021a1.pdf [file d5eb00021a1.pdf]

## Supplementary Information

### **Induced Orbital Asymmetry of Nonpolar Molecular Additives for Boosted Rapid Operating Performance in Lithium Metal Batteries**

Seo-Young Jun<sup>1</sup>, Chae Yeong Son<sup>1</sup>, Suji Kim<sup>1</sup>, Haesun Park<sup>2</sup>, and Won-Hee Ryu<sup>1,3,\*</sup>

<sup>1</sup>Department of Chemical and Biological Engineering, Sookmyung Women's University, 100 Cheongpa-ro 47-gil, Yongsan-gu, Seoul 04310, Republic of Korea.

<sup>2</sup>School of Integrative Engineering, Chung-Ang University, 84, Heukseok-ro, Dongjak-gu, Seoul, 06974, Republic of Korea

<sup>3</sup>Institute of Advanced Materials and Systems, Sookmyung Women's University, 100 Cheongpa-ro 47-gil, Yongsan-gu, Seoul 04310, Republic of Korea.

\* Corresponding author

E-mail: whryu@sookmyung.ac.kr (Prof. Won-Hee Ryu)

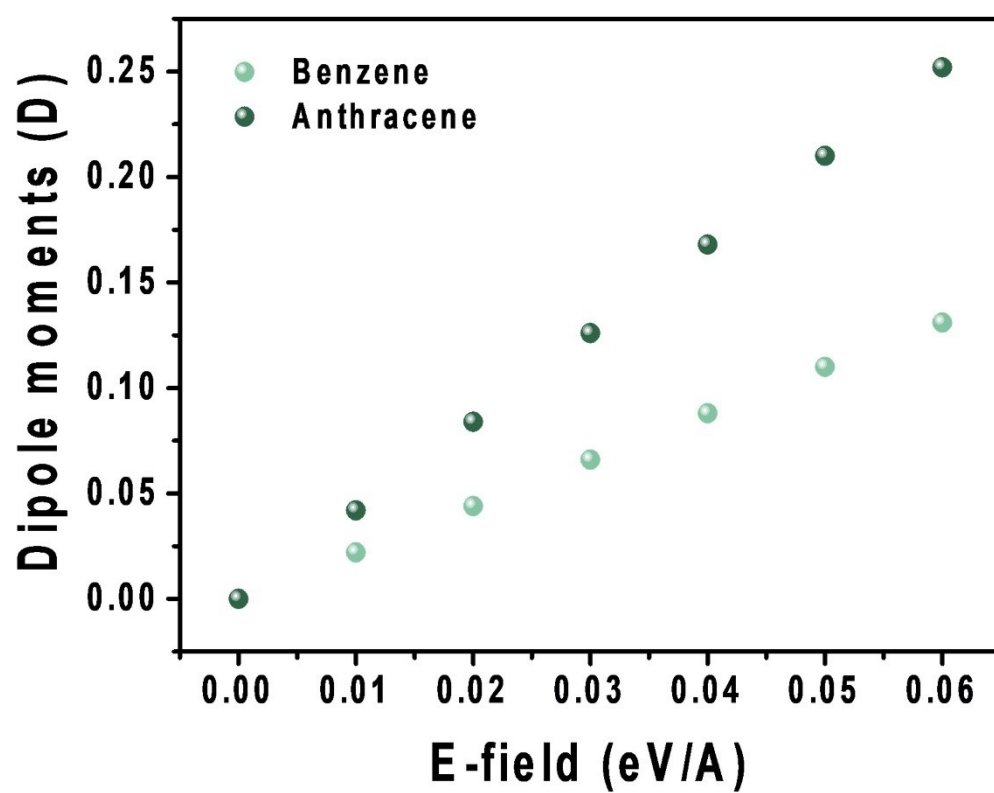

**Figure S1.** Graph of the calculated dipole moments of benzene and anthracene increasing with the E-field.

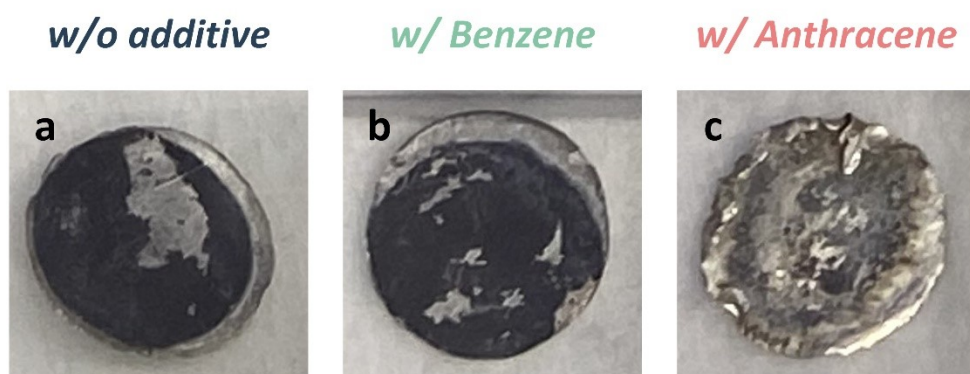

**Figure S2.** Digital images of the lithium metal anode from the disassembled Li–Li symmetric cells prepared (a) without additive, (b) with benzene, and (c) with anthracene.

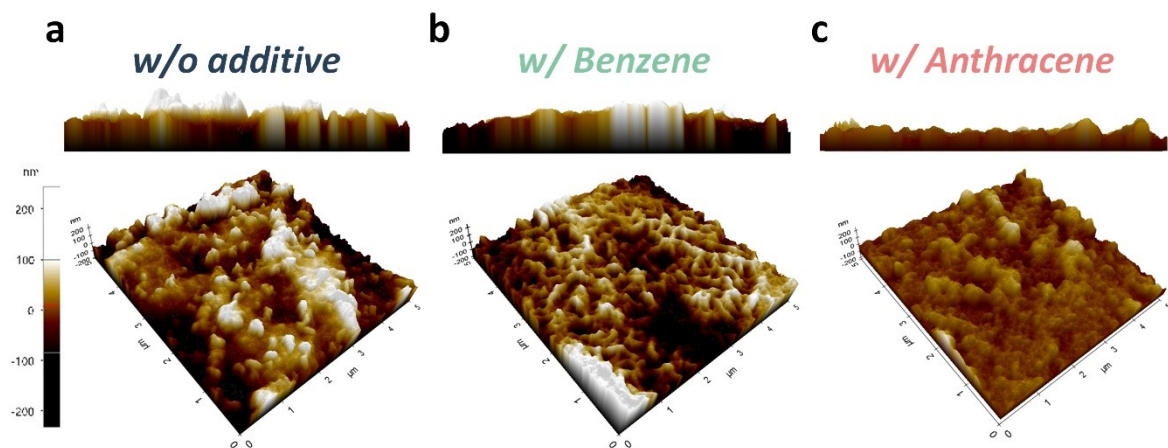

**Figure S3.** AFM images of the lithium metal electrode in the electrolyte (a) without additive, (b) with benzene, and (c) with anthracene.

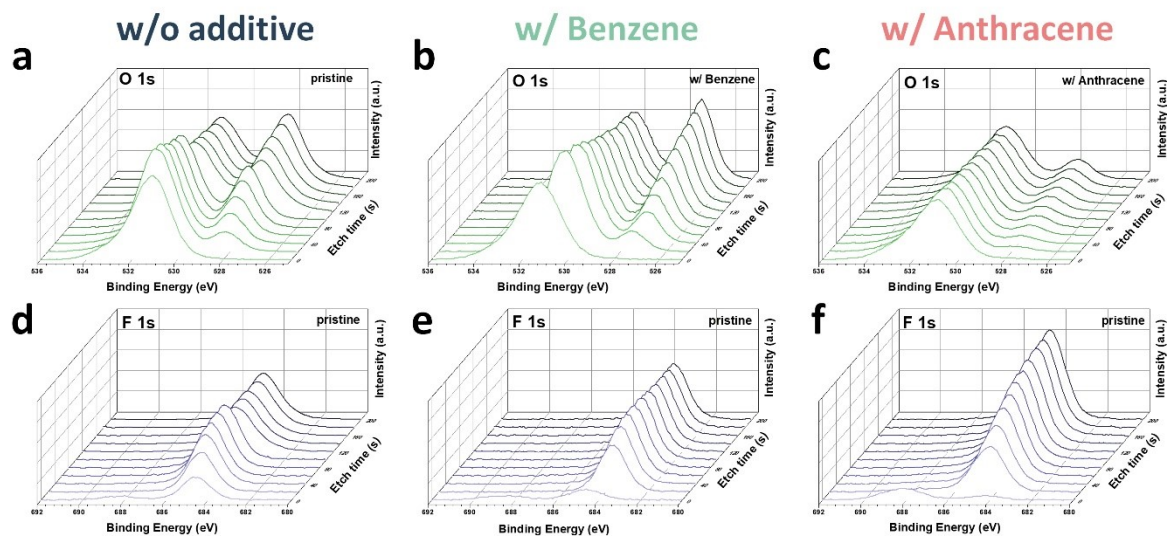

**Figure S4.** XPS depth profile results after 30 cycles. XPS depth profiles for O 1s using electrolyte (a) without additive, (b) with benzene, and (c) with anthracene. XPS depth profiles for F 1s using electrolyte (d) without additive, (e) with benzene, and (f) with anthracene.
